# Supplementary material for: Porous microspheres of MgO-patched TiO2 for CO2 photoreduction with H2O vapor: temperature-dependent activity and stability
Source: Royal Society of Chemistry journal article supplement (doi:10.1039/c3cc39054c), 2013-01-01
Supplement: c3cc39054c.pdf [file c3cc39054c.pdf]

## Electronic Supplementary Information

### **Porous Microspheres of MgO-Patched TiO<sub>2</sub> for CO<sub>2</sub> Photoreduction with H<sub>2</sub>O Vapor: Temperature-Dependent Activity and Stability**

**Lianjun Liu,<sup>a</sup> Cunyu Zhao,<sup>a</sup> Huilei Zhao,<sup>a</sup> Daniel Pitts,<sup>a</sup> Ying Li<sup>\*a</sup>**

Mechanical Engineering Department, University of Wisconsin-Milwaukee, Milwaukee, Wisconsin 53211, USA.

Fax: (+1) 414-229-6958;

Tel: (+1) 414-229-3716;

E-mail: [liying@uwm.edu](mailto:liying@uwm.edu)

## 1. Experiment

### 1.1 Catalyst preparation

MgO/TiO<sub>2</sub> microsphere composites were prepared by an ultrasonic spray pyrolysis (USP) process, similar to that reported in our previous study.<sup>1</sup> The apparatus and the formation mechanism were shown in Figure S1. The spraying solution was prepared by mixing an aqueous Mg(NO<sub>3</sub>)<sub>2</sub> solution and TiO<sub>2</sub> (Degussa P25) nanoparticles and sonicating for 30 min. The TiO<sub>2</sub> concentration was fixed at 16 mg/ml and the amount of Mg(NO<sub>3</sub>)<sub>2</sub> was calculated according to the atomic percentage of Mg to Ti (i.e., 20%) in the catalysts. The ultrasonic nebulizer (Sonaer) has a frequency of 2.4 MHz and produces droplets with a volumetric mean diameter of 1.8 μm. The generated fine mists containing Mg(NO<sub>3</sub>)<sub>2</sub>/TiO<sub>2</sub> were carried out by nitrogen gas and passed through a diffusion dryer composed of silica gels where the solvent (i.e., water) evaporated and Mg(NO<sub>3</sub>)<sub>2</sub> concentrated on the surface of TiO<sub>2</sub> particles. The particles then passed through a cylindrical quartz reactor that was placed inside a tube furnace (Thermo Fisher) with a set temperature of 500 °C. The Mg(NO<sub>3</sub>)<sub>2</sub> was thermally decomposed and deposited on the surface of TiO<sub>2</sub> forming MgO/TiO<sub>2</sub> microsphere composites. The spray-pyrolyzed particles were collected on a glass fiber filter placed inside a stainless-steel filter holder.

Pure TiO<sub>2</sub> sample was also prepared using the same USP method without the addition of Mg(NO<sub>3</sub>)<sub>2</sub>. Al<sub>2</sub>O<sub>3</sub>/TiO<sub>2</sub> was prepared by the same USP method with the addition of Al(NO<sub>3</sub>)<sub>3</sub>, and the atomic ratio of Al:Ti was 5%. CuO/TiO<sub>2</sub> was prepared by a wet-impregnation method with Cu(NO<sub>3</sub>)<sub>2</sub> and TiO<sub>2</sub>-P25. The atomic ratio of Cu:Ti was 1%. The resulting powders were finally calcined at 400 °C for 2 h.

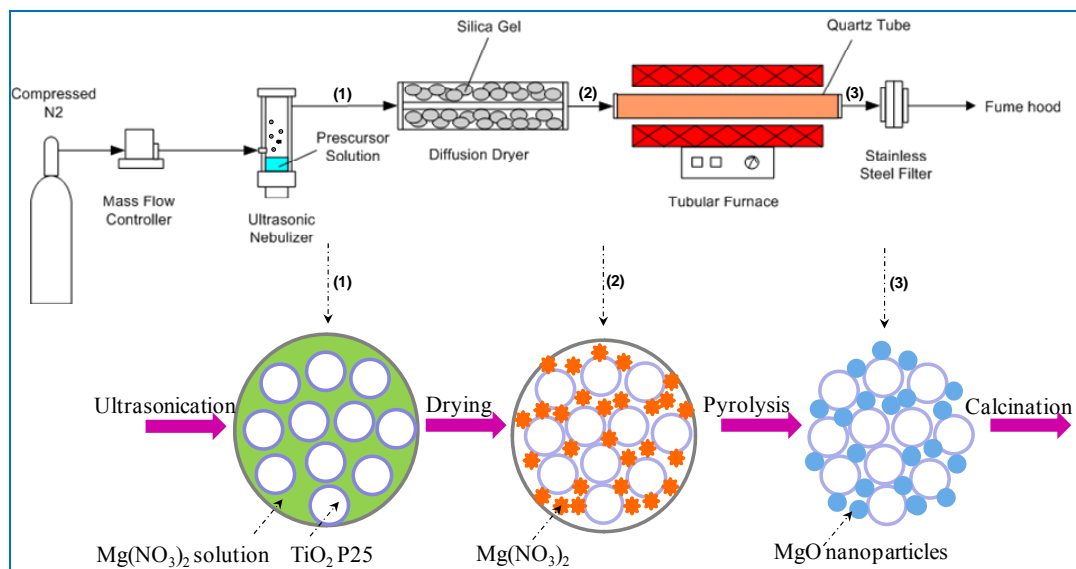

**Figure S1.** Schematic diagram of the ultrasonic spray pyrolysis process and the formation mechanism of MgO/TiO<sub>2</sub> porous microspheres

## 1.2 Catalyst characterization

The crystal structures of the  $\text{TiO}_2$ ,  $\text{MgO/TiO}_2$ ,  $\text{CuO/TiO}_2$  and  $\text{Al}_2\text{O}_3/\text{TiO}_2$  samples were identified by X-ray diffraction (XRD, Scintag XDS 2000) using  $\text{Cu K}\alpha$  irradiation at 45 kV and a diffracted beam monochromator at 40 mA. The surface area, pore size and pore volume of  $\text{TiO}_2$ ,  $\text{MgO/TiO}_2$ ,  $\text{CuO/TiO}_2$  and  $\text{Al}_2\text{O}_3/\text{TiO}_2$  were analyzed by nitrogen adsorption-desorption at 77 K using the Brunauer-Emmett-Teller (BET) method (Micromeritics, ASAP 2020). The UV-vis diffuse reflectance spectra were obtained by a UV-vis spectrometer (Ocean Optics) using  $\text{BaSO}_4$  as the background. Scanning electron microscopy (SEM) (Hitachi S4800) was used to obtain the catalysts surface morphology. The dispersion of elements (Mg, Ti, O) on  $\text{TiO}_2$  and  $\text{MgO/TiO}_2$  was analyzed by X-ray elemental mapping (XREM). The lattice structures of  $\text{CuO/TiO}_2$  and  $\text{MgO/TiO}_2$  were visualized by phase-contrast high resolution transmission electron microscopy (HRTEM) carried out with 300 keV electrons in a Hitachi H9000NAR instrument with 0.18 nm point and 0.11 nm lattice resolution. Amplitude contrast TEM images were used to obtain the information about the sizes and morphology.

## 1.3 In situ DRIFTS for reactant adsorption and intermediate/product desorption

All IR spectra were recorded on a Nicolet 6700 spectrometer (Thermo Electron) equipped with a liquid nitrogen cooled  $\text{HgCdTe}$  (MCT) detector. The spectra were displayed in absorbance units, and acquired with a resolution of  $4\text{ cm}^{-1}$ , using 32 scans. The DRIFTS studies were performed in a Praying Mantis DRIFTS accessory and a reaction chamber (Harrick Scientific, HVC-DRP). The reaction cell is equipped with a heater and a temperature controller, as well as a sample cup in the center. The dome of the DRIFTS cell has two KBr windows allowing IR transmission and a third (quartz) window allowing transmission of irradiation introduced through a liquid light guide (Newport) that connects to a 450 W Xe lamp (Oriel).

The reactant (e.g.,  $\text{CO}_2$  and  $\text{H}_2\text{O}$ ) adsorption on the catalyst surface was studied by introducing a  $\text{CO}_2/\text{H}_2\text{O}$  mixture to the IR cell. Prior to the adsorption, the samples were purged by He for 1 h at  $300\text{ }^\circ\text{C}$ . After the temperature was cooled down to  $50\text{ }^\circ\text{C}$ , the background spectrum in the presence of the sample was collected. For  $\text{CO}_2/\text{H}_2\text{O}$  co-adsorption,  $\text{CO}_2$  passed through water bubbler to bring a mixture of  $\text{CO}_2/\text{H}_2\text{O}$  vapor into the chamber at  $2.0\text{ ml/min}$ . Meanwhile, the IR spectra were recorded as a function of time (0 – 35 min) when the adsorption process reaches the saturation level. For the property of desorption, the experiments were firstly conducted by purging the catalyst surface with He for 30 min to investigate physis-desorption of surface species. Subsequently, the UV light was turned on for 45 min to investigate chemi-desorption of photocatalytic reaction intermediates/products (e.g., carbonate and bicarbonate).

Similar procedure was also conducted at 150 °C to investigate the dynamics of the reactant adsorption and intermediates desorption.

#### 1.4 Photocatalytic activity measurement

The experiments of CO<sub>2</sub> photoreduction with H<sub>2</sub>O on TiO<sub>2</sub> and MgO/TiO<sub>2</sub> catalysts were carried out in a photoreactor system.<sup>1</sup> For each test, 30 mg of catalysts were used and dispersed on a glass fiber inside the reactor. CO<sub>2</sub> continuously passed through a water bubbler to bring a mixed gas of CO<sub>2</sub>+H<sub>2</sub>O into the photoreactor at a flow rate of 2.0 ml/min. A 400 W Xe lamp (Oriel) was used as the light source, and the light intensity is about 420 mW/cm<sup>2</sup> in the range of 200 ~ 1000 nm. The light spectrum can be found in our previous publication.<sup>2</sup> The light irradiation from the Xe lamp resulted in a temperature at approximately 50 °C inside the photoreactor, measured by a thermocouple. To increase the reaction temperature to the range of 80 – 170 °C, a 250 W infrared lamp was used to heat up the photoreactor from the back (the housing of the reactor is stainless steel). The gaseous products in the reactor effluent were continuously analyzed by a gas chromatograph (GC, Agilent 7890A) equipped with both a thermal conductivity detector (TCD) and flame ionization detector (FID).

## 2. Results and discussion

**Table S1.** The BET surface area, pore volume, pore size and band gap of the  $\text{TiO}_2$ ,  $\text{MgO/TiO}_2$ ,  $\text{Al}_2\text{O}_3/\text{TiO}_2$  and  $\text{CuO/TiO}_2$  catalysts

| Samples                              | BET surface area ( $\text{m}^2/\text{g}$ ) | Pore volume ( $\text{cm}^3/\text{g}$ ) | Pore size (nm) | Band gap (eV) |
|--------------------------------------|--------------------------------------------|----------------------------------------|----------------|---------------|
| $\text{TiO}_2$                       | 52.1                                       | 0.241                                  | 18.5           | 3.19          |
| $\text{MgO/TiO}_2$                   | 45.1                                       | 0.249                                  | 21.9           | 3.23          |
| $\text{Al}_2\text{O}_3/\text{TiO}_2$ | 50.7                                       | 0.249                                  | 19.7           | 3.22          |
| $\text{CuO/TiO}_2$                   | 51.1                                       | 0.246                                  | 19.2           | 3.04          |

The BET surface areas of  $\text{TiO}_2$ ,  $\text{Al}_2\text{O}_3/\text{TiO}_2$  and  $\text{CuO/TiO}_2$  were comparable, slightly higher than  $\text{MgO/TiO}_2$ . The pore volumes of the four catalysts were similar. While  $\text{TiO}_2$  had the smallest pore size,  $\text{MgO/TiO}_2$  had the largest pore size. The band gaps of  $\text{TiO}_2$ ,  $\text{Al}_2\text{O}_3/\text{TiO}_2$  and  $\text{MgO/TiO}_2$  were comparable, slightly larger than that of  $\text{CuO/TiO}_2$ .

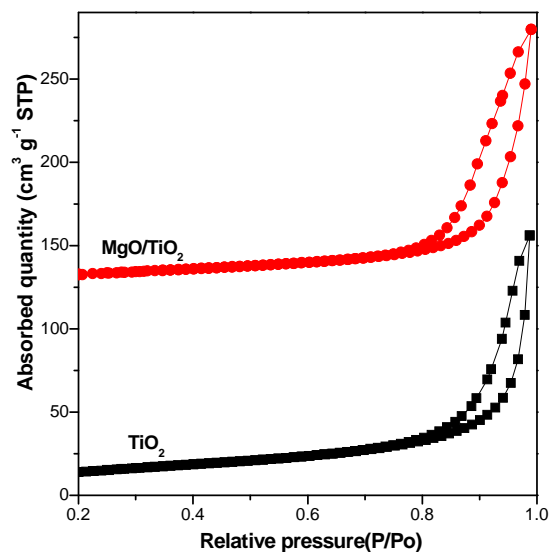

**Figure S2.**  $\text{N}_2$  sorption/desorption isotherms for  $\text{TiO}_2$  and  $\text{Mg/TiO}_2$

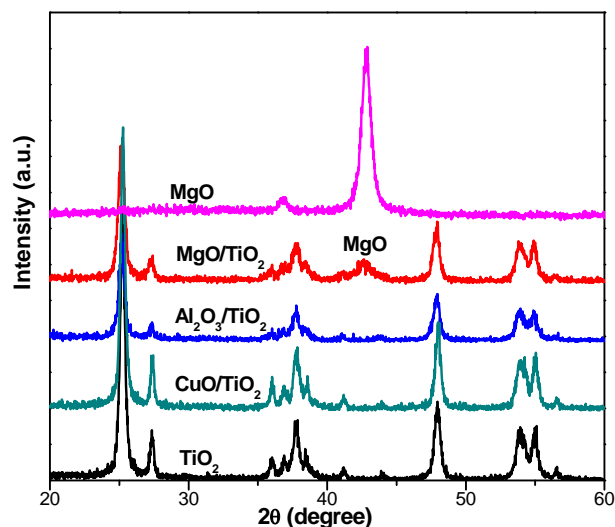

**Figure S3.** XRD patterns of  $\text{TiO}_2$ ,  $\text{CuO/TiO}_2$ ,  $\text{Al}_2\text{O}_3/\text{TiO}_2$ ,  $\text{MgO/TiO}_2$  and  $\text{MgO}$  samples

No  $\text{CuO}$  and  $\text{Al}_2\text{O}_3$  crystals were found in  $\text{CuO/TiO}_2$  and  $\text{Al}_2\text{O}_3/\text{TiO}_2$ , possibly due to their well dispersion or the low concentration (1.0 at% and 5.0 at%, respectively).

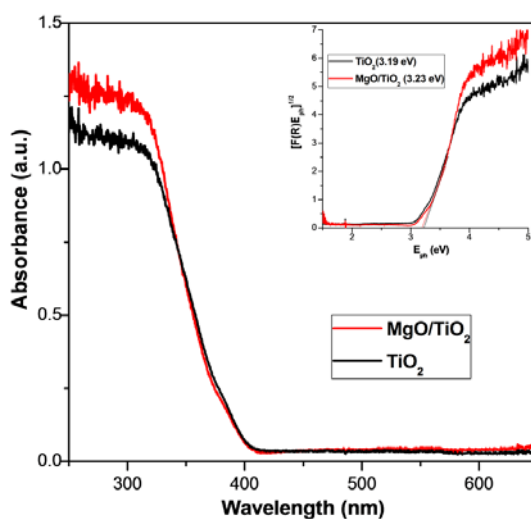

**Figure S4.** UV-vis spectra for  $\text{TiO}_2$  and  $\text{MgO/TiO}_2$ , and the inset are the band gap analysis

The absorption edges of bare  $\text{TiO}_2$  and  $\text{MgO/TiO}_2$  were around 400 nm, corresponding to a similar calculated band gap of 3.19 and 3.23 eV, respectively. Compared to  $\text{TiO}_2$ , however, the light absorption was slightly enhanced on  $\text{MgO/TiO}_2$  in the UV region, maybe because the dispersed  $\text{MgO}$  nanopatches on the  $\text{TiO}_2$  surface could increase the scattering of light.

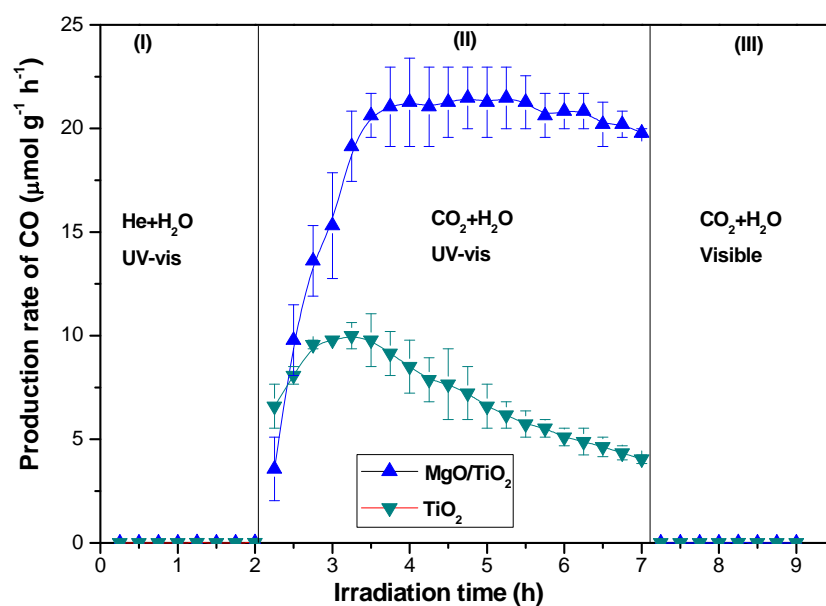

**Figure S5.** The production rate of CO on  $\text{TiO}_2$  and  $\text{MgO/TiO}_2$  at 150 °C: (I) helium +  $\text{H}_2\text{O}$  (without  $\text{CO}_2$ ) under the UV-vis light irradiation, (II)  $\text{CO}_2 + \text{H}_2\text{O}$  under the UV-vis light irradiation for two independent runs, and (III)  $\text{CO}_2 + \text{H}_2\text{O}$  under only visible light irradiation.

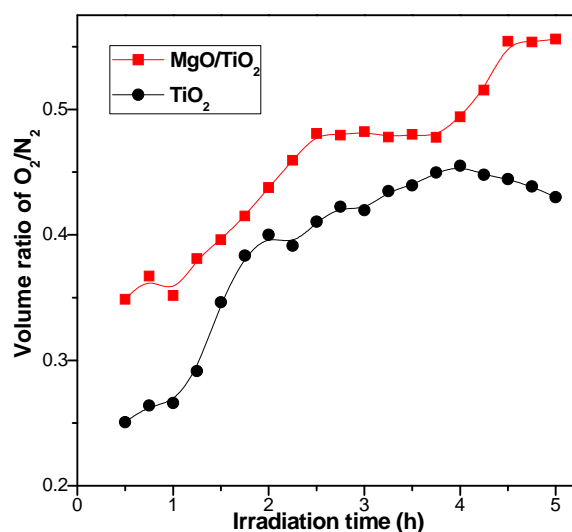

**Figure S6.** Time dependence of the volumetric ratio of O<sub>2</sub>/N<sub>2</sub> during CO<sub>2</sub> photoreduction with H<sub>2</sub>O on TiO<sub>2</sub> and MgO/TiO<sub>2</sub> at 150 °C

The production of O<sub>2</sub> from H<sub>2</sub>O oxidation was measured for TiO<sub>2</sub> and MgO/TiO<sub>2</sub> catalysts during the CO<sub>2</sub> photoreduction experiments operated at 150 °C. Before turning on the UV-vis illumination, the photoreactor was purged with a CO<sub>2</sub>+H<sub>2</sub>O flow to remove air inside the reactor. However, there was always background O<sub>2</sub> and N<sub>2</sub> in the order of a few hundred ppm detected in the reactor effluent gas even after purging for a few hours. Hence, a better indicator of O<sub>2</sub> production by the catalyst is the volumetric ratio of O<sub>2</sub>/N<sub>2</sub>, as also reported in our previous work<sup>2,3</sup> and a recent publication.<sup>4</sup> As shown in Figure S6, the O<sub>2</sub>/N<sub>2</sub> ratio gradually increased after 0.5 h photoillumination of TiO<sub>2</sub> and MgO/TiO<sub>2</sub>, suggesting the generation of O<sub>2</sub> through oxidation of H<sub>2</sub>O by photogenerated holes (i.e., H<sub>2</sub>O +  $h^+$  → 2H<sup>+</sup> + 1/2O<sub>2</sub>, [R1]). After 3.5 h photoillumination, the O<sub>2</sub>/N<sub>2</sub> ratio continued to increase on MgO/TiO<sub>2</sub>; by contrast, the O<sub>2</sub>/N<sub>2</sub> ratio on TiO<sub>2</sub> gradually decreased after 3.75 h. The O<sub>2</sub>/N<sub>2</sub> ratio by MgO/TiO<sub>2</sub> was always larger than by TiO<sub>2</sub>. This result suggested that MgO/TiO<sub>2</sub> was more active than TiO<sub>2</sub> for O<sub>2</sub> production, probably because of the enhancement on the adsorption of H<sub>2</sub>O by MgO modification as evidenced by the TGA results (see Figure S8).

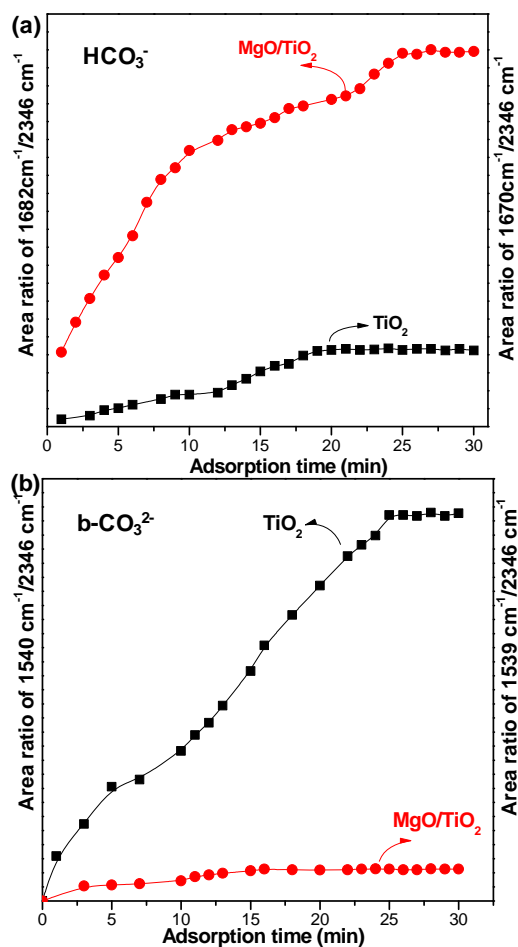

**Figure S7.** Time dependence of the ratio of (a) the peak area of  $\text{HCO}_3^-$  (1670-1682  $\text{cm}^{-1}$ ) and (b) the peak area of  $\text{b-CO}_3^{2-}$  (1540  $\text{cm}^{-1}$ ) to gaseous  $\text{CO}_2$  (2346  $\text{cm}^{-1}$ ) in the DRIFTS spectra over the  $\text{TiO}_2$  and  $\text{MgO/TiO}_2$  catalysts.

The extent of  $\text{HCO}_3^-$  formation on  $\text{TiO}_2$  versus  $\text{MgO/TiO}_2$  is quantified by normalizing the peak area of  $\text{HCO}_3^-$  in the 1670-1682  $\text{cm}^{-1}$  range by that of the gaseous  $\text{CO}_2$  peak at 2346  $\text{cm}^{-1}$  (i.e., peak area of  $\text{HCO}_3^-$ /peak area of  $\text{CO}_2$ ), since the gaseous  $\text{CO}_2$  concentration remained relatively constant. As shown in Figure S7a, the ratio of  $\text{HCO}_3^-$  peak to  $\text{CO}_2$  peak on  $\text{MgO/TiO}_2$  was much higher than on  $\text{TiO}_2$ . At the early stage (1-15 min), the formation of  $\text{HCO}_3^-$  was at a faster rate (a large slope) on  $\text{MgO/TiO}_2$  than on  $\text{TiO}_2$ . This result indicates that more  $\text{HCO}_3^-$  is formed on the  $\text{MgO/TiO}_2$  surface. Similarly, we have also plotted the ratio of the peak area of  $\text{b-CO}_3^{2-}$  (1540  $\text{cm}^{-1}$ ) to gaseous  $\text{CO}_2$  (2346  $\text{cm}^{-1}$ ) on the  $\text{TiO}_2$  and  $\text{MgO/TiO}_2$  catalysts (see Figure S7b). Opposite to the observation for the  $\text{HCO}_3^-$  peak, the  $\text{b-CO}_3^{2-}$  peak was much stronger on  $\text{TiO}_2$  than on  $\text{MgO/TiO}_2$ .

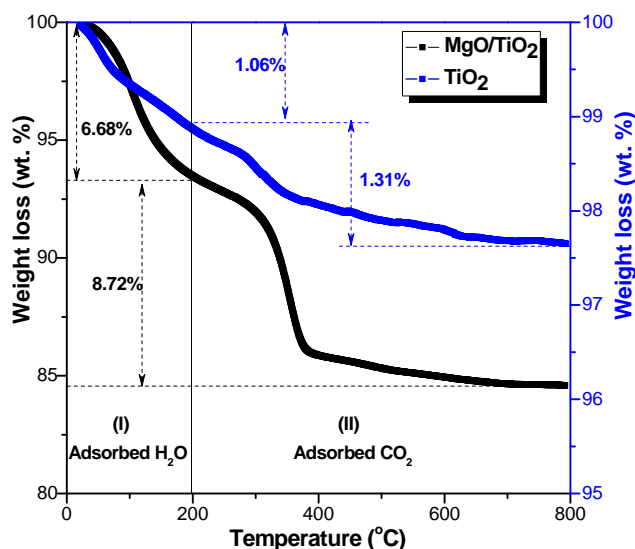

**Figure S8.** TGA profiles for the desorption of adsorbed CO<sub>2</sub> and H<sub>2</sub>O from TiO<sub>2</sub> and MgO/TiO<sub>2</sub> after CO<sub>2</sub> and H<sub>2</sub>O adsorption at 150 °C for 1 h

Thermal gravimetric analysis (TGA) was performed to investigate the effect of MgO modification on both H<sub>2</sub>O and CO<sub>2</sub> adsorption. The sequence of experimental procedure was: (1) CO<sub>2</sub> and H<sub>2</sub>O adsorption on the catalyst (TiO<sub>2</sub> or MgO/TiO<sub>2</sub>) at 150 °C for 1 h; (2) cooling down the temperature to room temperature, and (3) desorption in an air flow in the range of 20 °C to 800 °C. The TGA profiles in the desorption step were shown in Figure S8. The weight loss in regions (I) and (II) was due to the removal of adsorbed H<sub>2</sub>O and CO<sub>2</sub>, respectively. Obviously, the weight loss of both adsorbed H<sub>2</sub>O and CO<sub>2</sub> from MgO/TiO<sub>2</sub> (6.68% and 8.72%, respectively) was higher than that from TiO<sub>2</sub> (1.06% and 1.31%, respectively). This result demonstrated that MgO modification promoted the adsorption of both H<sub>2</sub>O and CO<sub>2</sub>, because MgO has a hygroscopic nature and abundant hydroxyl groups.<sup>5</sup> The TGA results were consistent with the in situ DRIFTS analysis that MgO enhanced the formation of HCO<sub>3</sub><sup>-</sup> species (Figure 3 in the main text).

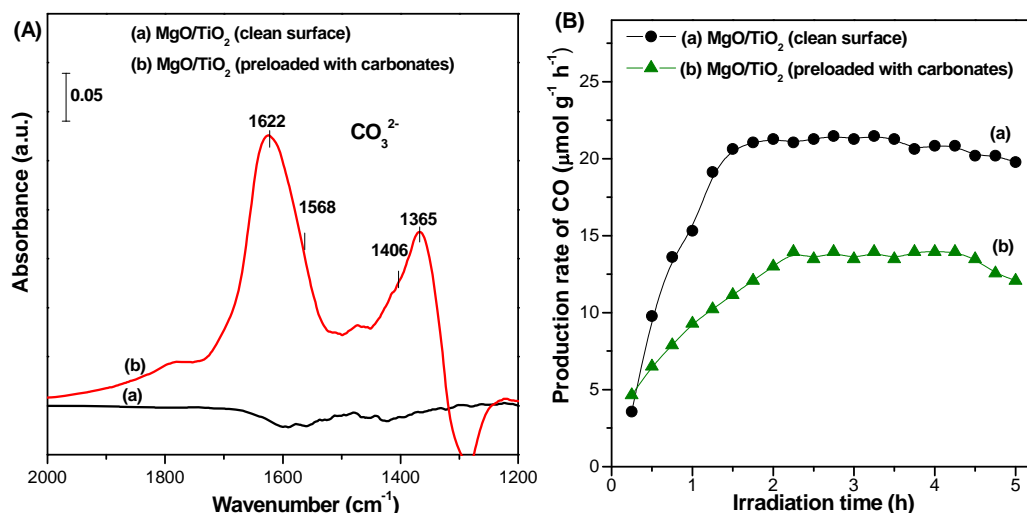

**Figure S9.** (A) FTIR spectra for MgO/TiO<sub>2</sub> (clean surface) and MgO/TiO<sub>2</sub> preloaded with carbonates; (B) The rate of CO production from CO<sub>2</sub> photoreduction with H<sub>2</sub>O at 150 °C under UV-vis light irradiation on MgO/TiO<sub>2</sub> (clean surface) and MgO/TiO<sub>2</sub> preloaded with carbonates.

To intentionally poison MgO/TiO<sub>2</sub>, we exposed MgO/TiO<sub>2</sub> to a flow of dry CO<sub>2</sub> at 400 °C for 2 h. It is noted that exposure of MgO/TiO<sub>2</sub> to moisturized CO<sub>2</sub> at lower temperatures (Figure 3b in the main text) resulted in the formation of dominating bicarbonate species and minor carbonate species. By contrast, exposure of MgO/TiO<sub>2</sub> to dry CO<sub>2</sub> at 400 °C leads to the formation of mainly carbonate species, as evidenced in the FTIR spectra shown in Figure S9A. The formed carbonate species are bidentate carbonates at 1622 and 1365 cm<sup>-1</sup> and monodentate carbonates at 1568 and 1406 cm<sup>-1</sup> [6-8].

The photocatalytic activity of the MgO/TiO<sub>2</sub> preloaded with carbonates was measured for CO<sub>2</sub> photoreduction with H<sub>2</sub>O at 150 °C, and the result was compared with that obtained on the clean MgO/TiO<sub>2</sub> catalyst (Figure S9B). It is clear that both the initial rates (during the first 2 h) and the steady-state rate (after 2 h) of CO production on the clean MgO/TiO<sub>2</sub> are significantly higher than those on the MgO/TiO<sub>2</sub> preloaded with carbonates. This result confirmed that carbonate species have poisoning effect to the catalyst, most likely by occupying the surface active sites.

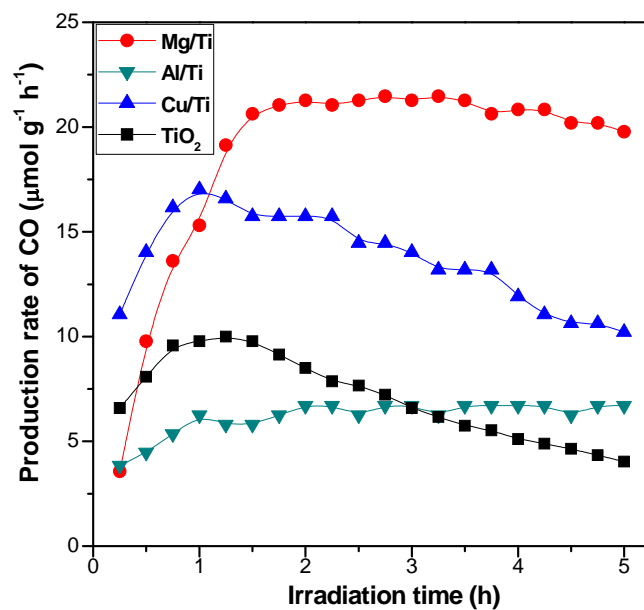

**Figure S10.** Comparison of the production rate of CO on TiO<sub>2</sub>, MgO/TiO<sub>2</sub> (Mg/Ti), CuO/TiO<sub>2</sub> (Cu/Ti) and Al<sub>2</sub>O<sub>3</sub>/TiO<sub>2</sub> (Al/Ti) at 150 °C

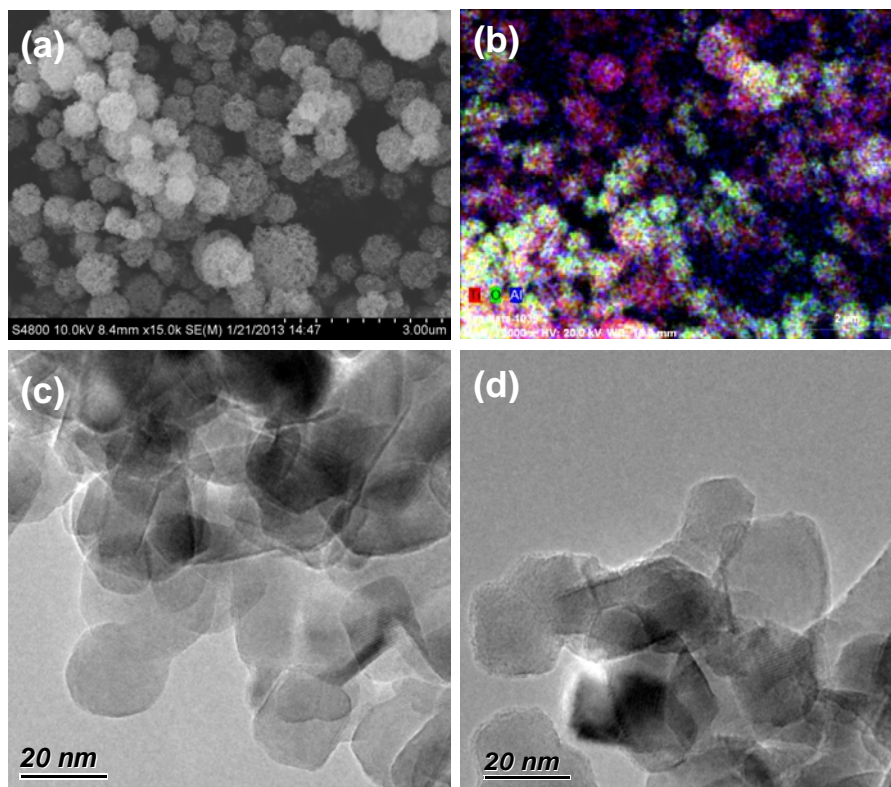

**Figure S11.** (a) SEM image and (b) X-ray elemental mapping image for  $\text{Al}_2\text{O}_3/\text{TiO}_2$ , and TEM images for (c)  $\text{CuO}/\text{TiO}_2$ , and (d)  $\text{MgO}/\text{TiO}_2$

The average diameter of  $\text{Al}_2\text{O}_3/\text{TiO}_2$  microspheres was about 0.7 μm (Figure S11a). Similar to  $\text{MgO}/\text{TiO}_2$ , the elemental mapping image of  $\text{Al}_2\text{O}_3/\text{TiO}_2$  (Figure S11b) showed that  $\text{Al}_2\text{O}_3$  particles were patched on the surface of  $\text{TiO}_2$  spheres. The TEM images in Figure S11c-d demonstrated that the individual particles size of  $\text{CuO}/\text{TiO}_2$  and  $\text{MgO}/\text{TiO}_2$  was around 20 nm.

## References:

1. C. Y. Zhao, A. Krall, H. L. Zhao, Q. Y. Zhang and Y. Li, *Int. J. Hydrogen Energy*, 2012, **37**, 9967.
2. Q. Y. Zhang, E. A. Ackerman, M. Gajdardziska-Josifovska, H. L. Li and Y. Li, *Appl. Catal. A-Gen.*, 2011, **400**, 195.
3. L. L. Liu, H. L. Zhao, J. M. Andino and Y. Li, *ACS Catal.*, 2012, **2**, 1817.
4. W. N. Wang, W. J. An, B. Ramalingam, S. Mukherjee, D. M. Niedzwiedzki, S. Gangopadhyay and P. Biswas, *J. Am. Chem. Soc.*, 2012, **134**, 11276.
5. H. S. Jung, J. K. Lee and M. Nastasi, *Appl. Phys. Letters*, 2006, **88**, 0131071.
6. Y. Kohno, H. Ishikawa, T. Tanaka, T. Funabiki and S. Yoshida, *Phys. Chem. Chem. Phys.*, 2001, **3**, 1108.
7. G. S. Hu, L. Zhu, A. P. Jia, X. Hu, G. Q. Xie, J. Q. Lu, and M. F. Luo, *Appl. Spectroscopy*, 2012, **66**, 122.
8. D. Cornu, H. Guesmi, J. M. Krafft, and H. Lauron-Perno, *J. Phys. Chem. C*, 2012, **116**, 6645.
